# Supplementary material for: New 2+2, 3+3 and 4+4 macrocycles derived from 1,2-diaminocyclohexane and 2,6-diformylpyridine
Source: Royal Society of Chemistry journal article supplement (doi:10.1039/b505909g), 2005-01-01
Supplement: b505909g.pdf [file b505909g.pdf]

## Supplementary material

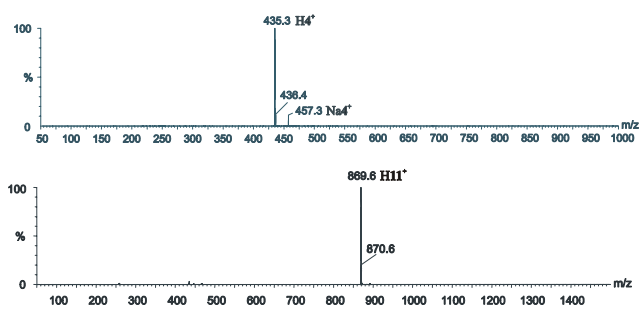

**Supplementary Figure** ESI-MS spectra of the macrocyclic amines **4** (upper spectrum) and **11** (lower spectrum).
